# Supplementary material
Source: Springer Nature journal article supplement (https://www.springermedizin.de/resource/supplementary/12885_2006_534_MOESM1_ESM.pdf/9469702)

Progression free survival (%)

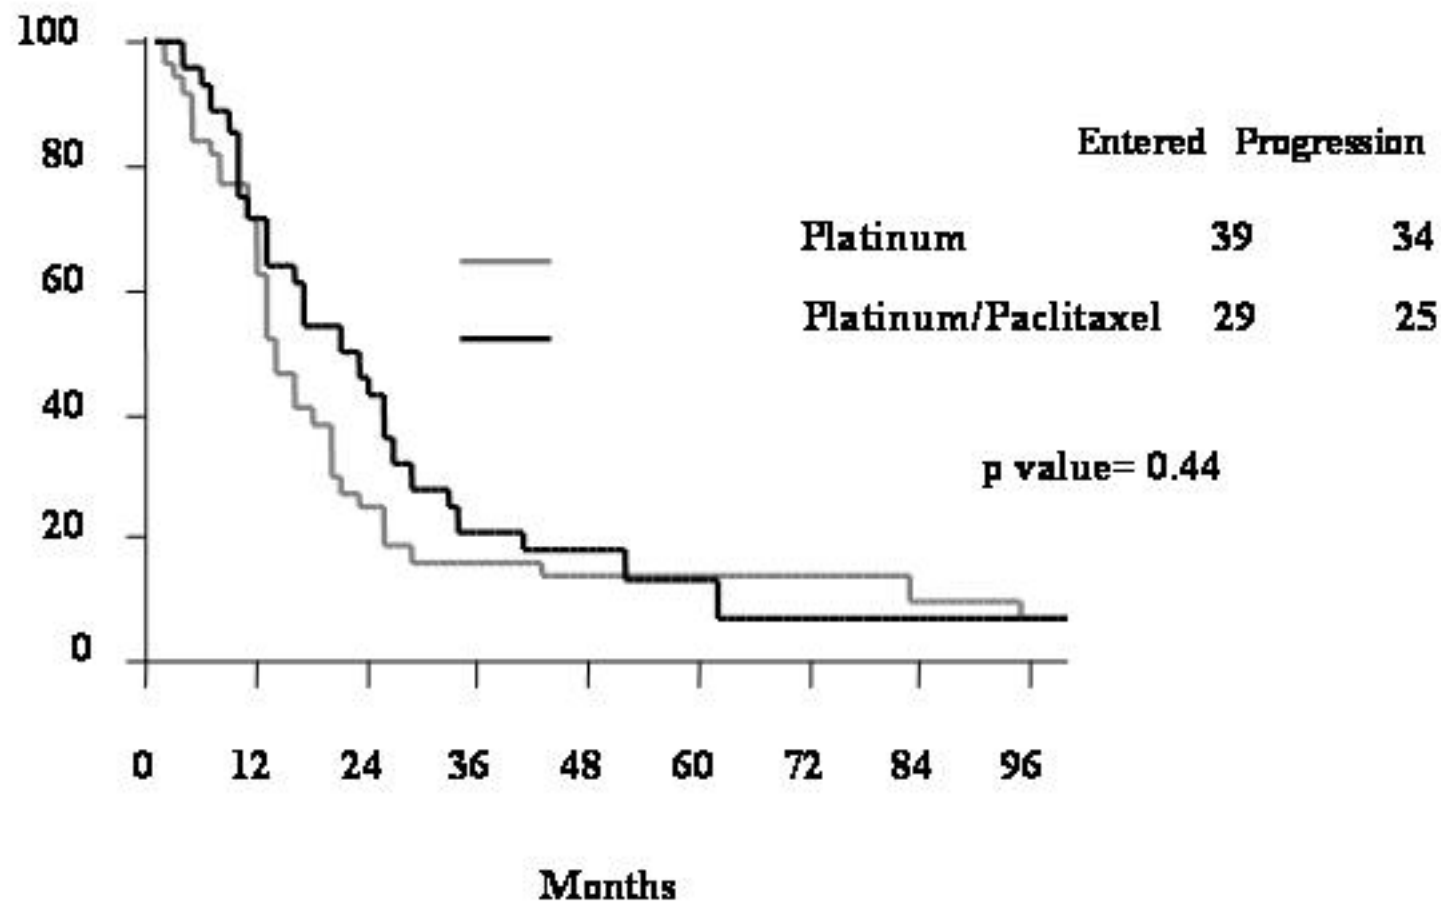

Supplement: MOESM1 [file 9469702]
